# Supplementary material
Source: PubMed Central journal article supplement (PMC3719780)
Supplement: AAC.02475-12_zac009132013so1.pdf [file AAC.02475-12_zac009132013so1.pdf]

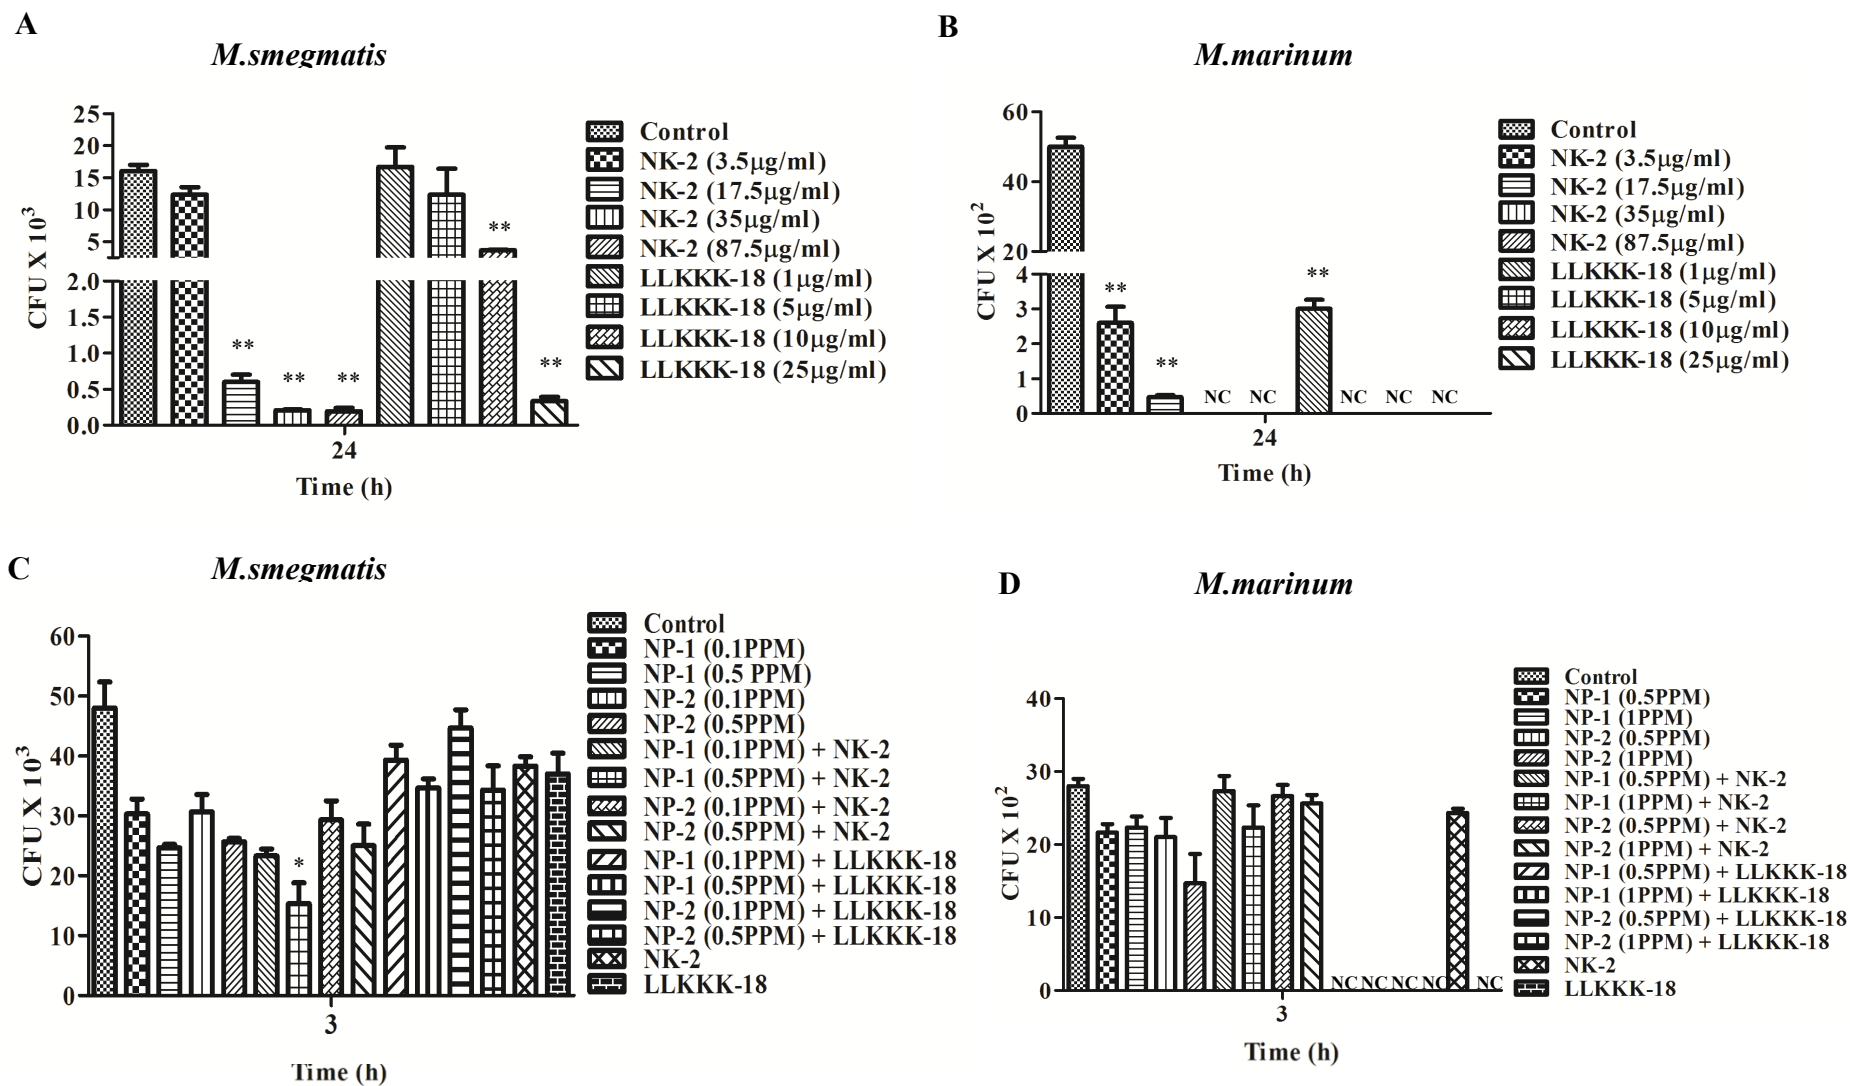

**FIG S1** Antibacterial activity of nanoparticles and peptides against mycobacteria. *M. smegmatis* (A) and *M. marinum* (B) were incubated with different concentrations of peptides (NK-2 and LLKKK-18) for 24 h. To check the additive activity of nanoparticles and peptides, *M. smegmatis* (C) and *M. marinum* (D) were incubated with nanoparticles (NP-1 and NP-2) and peptides (NK-2 and LLKKK-18) alone and in combinations for 3 h. The antimycobacterial activity of nanoparticles and peptides and the additive effect of both were checked by performing CFU assay. Bacterial survival rate was determined by plating serially diluted samples at the indicated time point. Medium containing bacteria alone were used as control. Experiments were performed in triplicates; mean  $\pm$  SD are shown. \*\*P-value  $\leq$  0.01 and \*P-value  $\leq$  0.05.

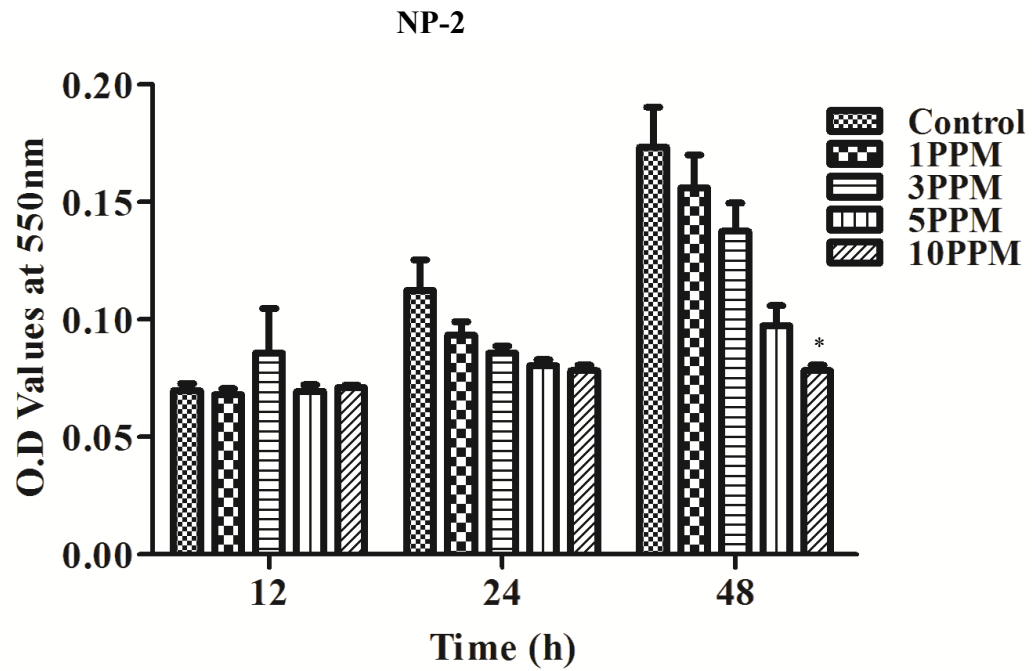

**FIG S2** Quantification of free nitric oxide production in NP-2 treated macrophages using Griess reagent. Untreated cells were used as control. Experiments were performed in triplicates. mean  $\pm$  SD are shown; \*P-value  $\leq$  0.05.
